# Supplementary material
Source: publisher figshare collection journal article supplement (https://rs.figshare.com/ndownloader/files/36851438)
Supplement: Supplementary file 1 [file 36851438]

## Sheet: Sheet1
Table S1: Principal component loadings for the Viperid species environmental data matrix
BioClimVar	Comp.1	Comp.2	Comp.3	Comp.4	Comp.5	Comp.6	Comp.7	Comp.8	Comp.9	Comp.10	Comp.11	Comp.12	Comp.13	Comp.14	Comp.15	Comp.16	Comp.17	Comp.18	Comp.19
Bio1	0.0135445	0.00192086	0.0892492	0.324181	0.155651	0.0399461	0.0118543	0.0720704	0.0367152	0.258021	0.050733	0.0117703	0.48488	0.0823661	0.0158685	0.12345	0.7231	0.0685868	3.49e-11
Bio2	-0.00459507	0.0182872	0.0335194	0.127743	-0.0139144	0.00483607	-0.017376	-0.589672	-0.0144949	-0.00566963	-0.0692165	-0.0113255	0.0850761	-0.70752	-0.115526	-0.309308	0.0926216	-0.0582185	3.43e-12
Bio3	0.00448349	0.00264294	0.00394937	0.0367166	-0.00110318	0.00650772	-0.0217505	-0.131045	0.025022	0.00939519	-0.0123322	0.0287573	-0.0666562	-0.296108	0.689019	0.630233	-0.0623328	0.106194	5.5e-11
Bio4	-0.980033	-0.18941	0.0139397	0.0341293	-0.00768106	-0.00401214	0.0123225	0.0345057	0.00101655	-0.00193382	0.00835121	5.25e-06	0.000940547	-0.021819	0.00339395	-0.00327281	0.000798081	0.0175644	1.01e-11
Bio5	-0.00290085	0.0101377	0.0826257	0.375242	0.103396	0.0375231	0.0487653	-0.228603	0.0798866	0.276353	-0.121268	-0.0345969	-0.548004	0.218953	-0.0101942	-0.0139123	0.0705597	0.00240755	0.57735
Bio6	0.028395	-0.00208216	0.0486299	0.254628	0.141017	-0.00531144	0.0638248	0.383506	0.0648728	0.225275	-0.0119024	-0.0318774	-0.515698	-0.269455	0.0210601	-0.125526	0.127294	-0.0228371	-0.57735
Bio7	-0.0312959	0.0122199	0.0339958	0.120614	-0.0376209	0.0428345	-0.0150595	-0.612109	0.0150138	0.0510781	-0.109366	-0.00271946	-0.0323055	0.488408	-0.0312543	0.111614	-0.0567343	0.0252447	-0.57735
Bio8	0.00720773	-0.00681327	0.202065	0.325868	0.278551	0.220839	-0.6027	0.0691053	-0.192561	-0.561839	-0.038231	-0.0296663	-0.050655	0.0281927	-0.00583481	0.00254898	0.00344661	0.00111786	-8.15e-13
Bio9	0.0190056	0.0179504	-0.0190386	0.373183	0.0696429	-0.25559	0.682974	0.0146355	-0.0814157	-0.559718	-0.0114126	0.0175198	0.021786	0.0298568	0.00124933	0.0334969	0.00186973	-0.00148092	-2.64e-12
Bio10	0.000822183	0.000655963	0.08259	0.32343	0.1463	0.0351602	0.0170051	0.0742195	0.0420543	0.246026	0.0501166	0.00126362	0.291118	-0.00491754	0.0339058	0.0631016	-0.42737	-0.72303	-3.77e-10
Bio11	0.0261529	0.00583703	0.0823403	0.320868	0.145926	0.0284243	0.022873	0.0757441	0.0402547	0.238704	0.0595767	-0.00508433	0.265608	-0.0528848	-0.0733099	-0.0871852	-0.506399	0.675461	3.51e-10
Bio12	0.163875	-0.863642	-0.153962	0.00155228	0.0696841	0.3157	0.0890815	-0.0352141	0.279626	-0.0848648	0.0513082	0.0398035	-0.000432092	-0.00867556	-0.0121742	-0.00527565	0.00147633	-0.000562775	2.44e-13
Bio13	0.0287049	-0.114068	0.155461	0.0776662	-0.230002	-0.0186933	-0.0208056	0.0561751	-0.265125	0.0689583	-0.187139	0.886376	-0.0208792	-0.0163193	-0.0494146	0.014096	-0.00701924	0.00164566	3.81e-13
Bio14	0.00267214	-0.0378451	-0.073687	-0.0543391	0.138757	0.0277445	0.037863	-0.0245377	-0.244215	0.0703876	0.0680658	-0.0655094	-0.0985982	-0.184553	-0.664714	0.63913	-0.0206188	0.00774313	1.43e-14
Bio15	0.00331444	0.0169019	0.0693981	0.0700445	-0.0938791	-0.0524638	-0.0458945	-0.129819	-0.0329837	-0.0174069	0.954836	0.158472	-0.129741	0.0346108	0.0264968	-0.0423372	0.0255046	-0.00805544	-3.71e-12
Bio16	0.0771496	-0.311131	0.384773	0.142171	-0.584065	-0.0997737	-0.0105822	0.0704534	-0.431273	0.087098	-0.029491	-0.420353	0.0158595	0.00129818	0.037649	-0.000173315	0.000610139	0.000844051	6.58e-13
Bio17	0.0100479	-0.127881	-0.248461	-0.155473	0.448486	0.078516	0.131259	-0.0774645	-0.728983	0.174968	0.0410815	-0.0389609	-0.00846611	0.0683687	0.238541	-0.200503	0.00455281	-0.00129356	1.61e-13
Bio18	0.039396	-0.238421	0.563954	-0.286909	0.426964	-0.579535	-0.0468682	-0.0751274	0.114762	0.0270529	-0.0192631	0.0245109	-0.00929531	0.0154376	-0.00184627	0.00514498	-0.00346326	-0.00154737	-1.72e-12
Bio19	0.0334191	-0.180314	-0.582765	0.249546	-0.0894125	-0.650686	-0.360965	0.00441831	-0.0104019	0.0311694	-0.0320309	-0.00189178	0.0132645	0.0191147	-0.0099837	0.00543271	0.000490342	-0.000130834	-1.04e-12
